# Supplementary material for: Identification of Core Gene Biomarkers in Patients with Diabetic Cardiomyopathy
Source: Hindawi journal article supplement (doi:10.1155/2018/6025061), 2018-12-19

Figure S1

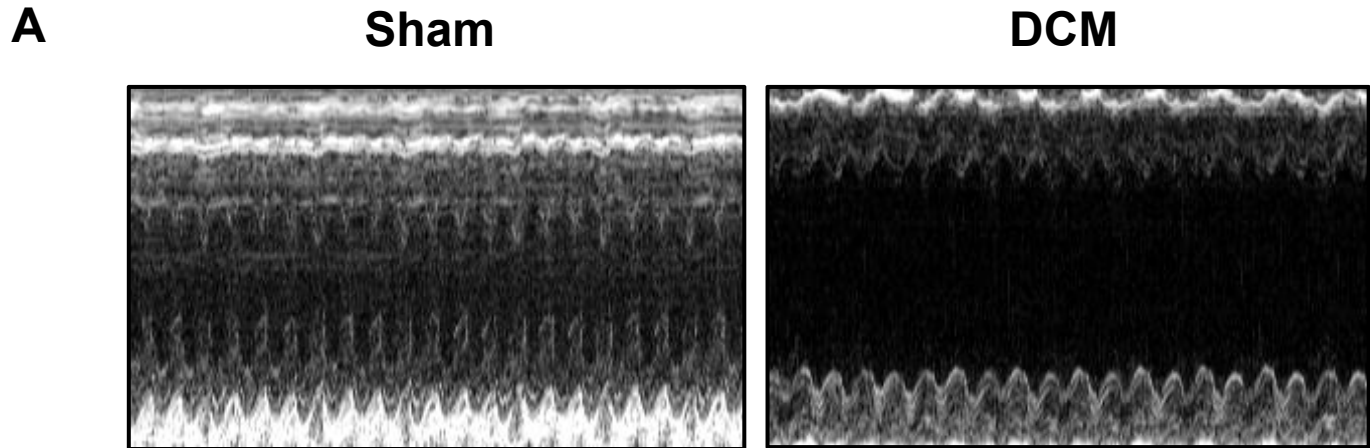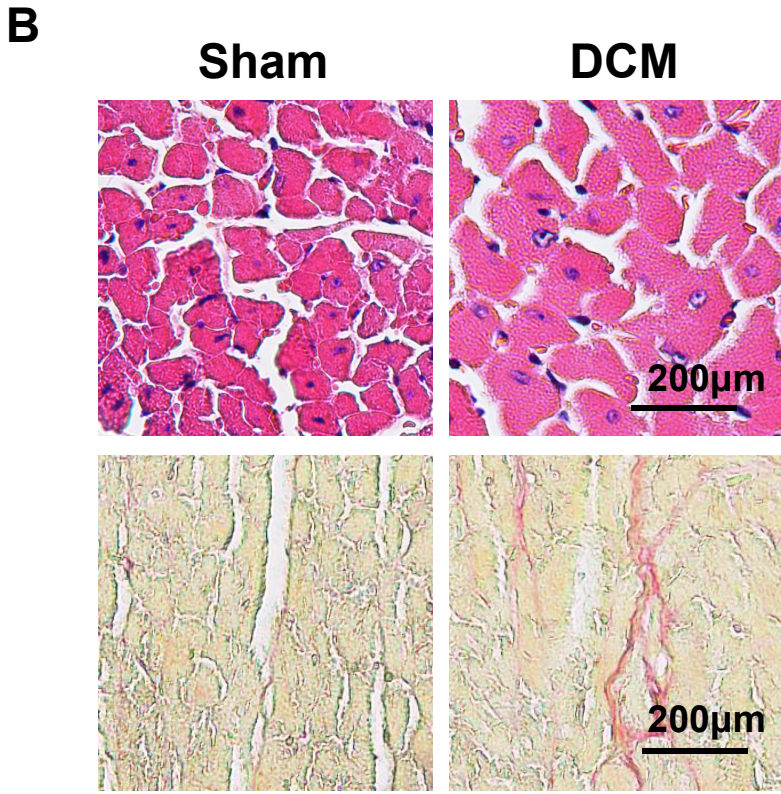

Supplement: f2 [file 6025061.f2.pdf]
