# Supplementary figures and images for: Identification of Core Gene Biomarkers in Patients with Diabetic Cardiomyopathy
Source: Hindawi journal article supplement (doi:10.1155/2018/6025061), 2018-12-19

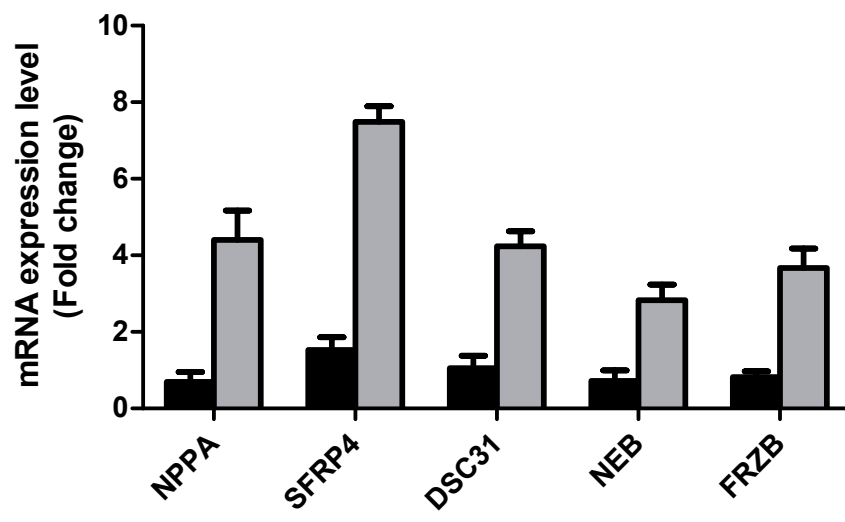

Supplement: f3 [file 6025061.f3.zip]

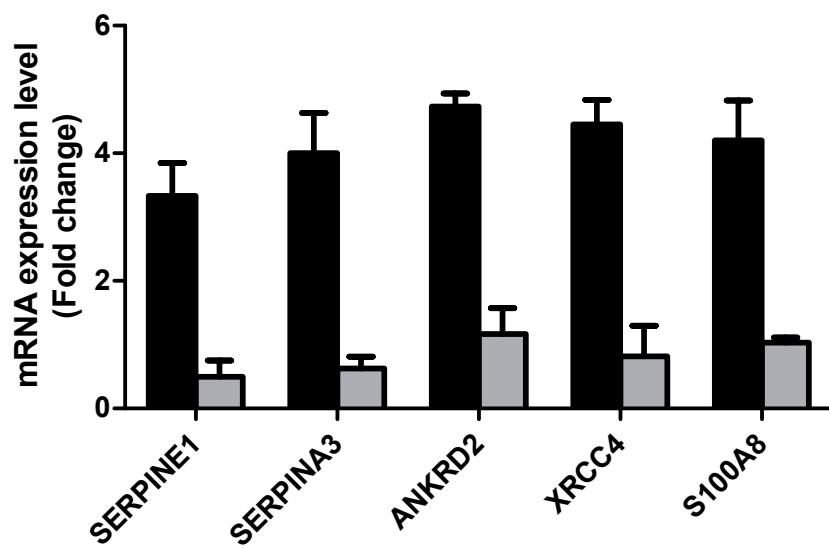

Supplement: f3 [file 6025061.f3.zip]

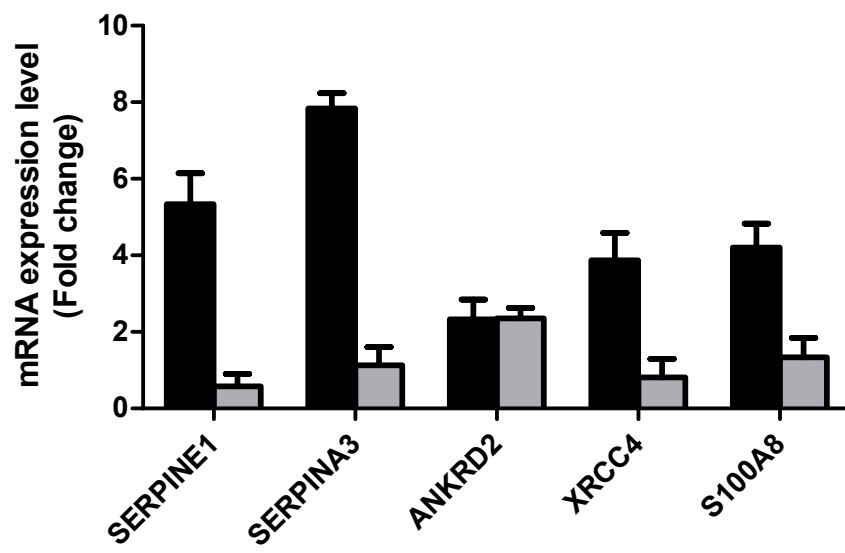

Supplement: f3 [file 6025061.f3.zip]

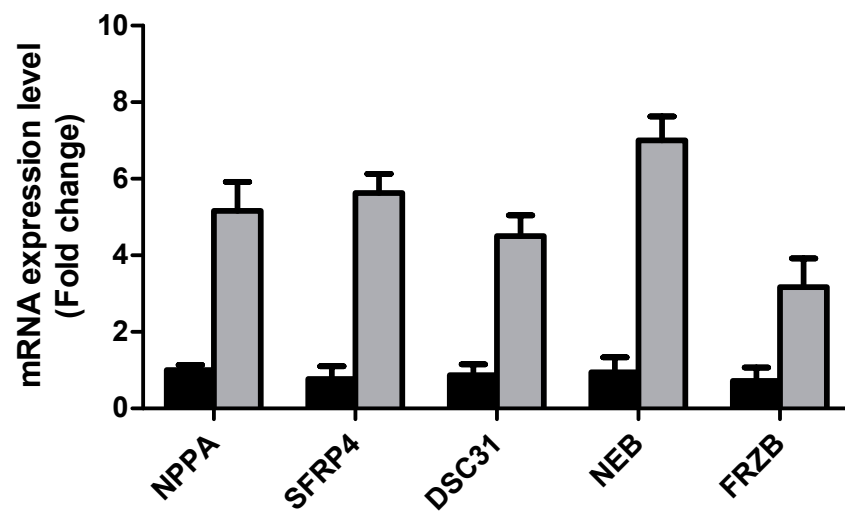

Supplement: f3 [file 6025061.f3.zip]
